# Supplementary material
Source: Springer Nature journal article supplement (https://www.springermedizin.de/resource/supplementary/12967_2011_799_MOESM4_ESM.pdf/9577054)
Supplement: MOESM4 [file 9577054]

|                       | days | 1 | 2 | 3 | 4 | 5 |
|-----------------------|------|---|---|---|---|---|
| Liver Transplantation |      | X |   |   |   |   |
| Basiliximab           |      | X |   |   |   | X |
| Prednisolone          |      | X | X | X | X | X |
| Mycophenolic acid     |      | X | X | X | X | X |
| MAPC                  |      | X |   | X |   |   |
